# Supplementary material
Source: PubMed Central journal article supplement (PMC4237711)
Supplement: NIHMS639050-supplement-Supp_TableS1.pdf [file NIHMS639050-supplement-Supp_TableS1.pdf]

**SUPPLEMENTAL TABLE I. Criteria for the assignment of objective response measure scores**

| <b>Objective Response Measure</b> | <b>Criteria</b>                                                                  | <b>Score</b> |
|-----------------------------------|----------------------------------------------------------------------------------|--------------|
| Progressive disease 1 (PD1)       | %hCD45 never drops below 1%; events observed before end of study; T/C $\leq$ 1.5 | 0            |
| Progressive disease 2 (PD2)       | %hCD45 never drops below 1%; events observed before end of study; T/C $>$ 1.5    | 2            |
| Stable disease (SD)               | %hCD45 never drops below 1%; events not observed before end of study             | 4            |
| Partial response (PR)             | %hCD45 $<$ 1% for only 1 week                                                    | 6            |
| Complete response (CR)            | %hCD45 $<$ 1% for 2 consecutive weeks                                            | 8            |
| Maintained CR (MCR)               | %hCD45 $<$ 1% for 2 consecutive weeks and at end of study hCD45% $<$ 1%          | 10           |

Scores of MCR, CR, and PR are classified as an Objective Response (OR).
