# Supplementary material
Source: PubMed Central journal article supplement (PMC4237711)
Supplement: NIHMS639050-supplement-Supp_TableS2.pdf [file NIHMS639050-supplement-Supp_TableS2.pdf]

**Supplemental Table II. Efficacy of CPX-351 against PPTP Xenograft Models**

| Study Information |           |                  | Animal Counts/Status |                 |                 |                 | EFS Evaluation  |                     |                      | Response Evaluation           |                       |                                                |    |     |     |    |    | Overall Group Response |     |              |     |    |
|-------------------|-----------|------------------|----------------------|-----------------|-----------------|-----------------|-----------------|---------------------|----------------------|-------------------------------|-----------------------|------------------------------------------------|----|-----|-----|----|----|------------------------|-----|--------------|-----|----|
| Tumor Type        | Cell Line | Line Description | Group                | N1 <sup>3</sup> | Nd <sup>4</sup> | No <sup>5</sup> | Na <sup>6</sup> | No. ev <sup>7</sup> | KM med. <sup>8</sup> | Log-Rank P-value <sup>9</sup> | EFS T/C <sup>10</sup> | Median RTV/CD45% at end of study <sup>11</sup> | PD | PD1 | PD2 | SD | PR | CR                     | MCR | Median Score |     |    |
| ALL B-precursor   | G1        | ALL-2            | A <sup>1</sup>       | 9               | 0               | 0               | 9               | 9                   | 10.8                 |                               |                       | >25                                            | 9  | 0   | 0   | 0  | 0  | 0                      | 0   | 0            | 0.0 | PD |
|                   |           |                  | B <sup>2</sup>       | 8               | 0               | 0               | 8               | 5                   | 41.9                 | <0.001                        | 3.9                   | >25                                            | 0  | 0   | 0   | 0  | 1  | 7                      | 0   | 0            | 8.0 | CR |
| ALL B-precursor   | G3        | ALL-4            | A                    | 8               | 0               | 4               | 4               | 4                   | 5.6                  |                               |                       | >25                                            | 4  | 0   | 0   | 0  | 0  | 0                      | 0   | 0            | 0.0 | PD |
|                   |           |                  | B                    | 9               | 1               | 3               | 5               | 3                   | 33.8                 | 0.024                         | 6.0                   | >25                                            | 0  | 0   | 0   | 0  | 2  | 3                      | 0   | 0            | 8.0 | CR |
| ALL B-precursor   | G4        | ALL-7            | A                    | 8               | 0               | 0               | 8               | 8                   | 2.4                  |                               |                       | >25                                            | 8  | 0   | 0   | 0  | 0  | 0                      | 0   | 0            | 0.0 | PD |
|                   |           |                  | B                    | 7               | 0               | 1               | 6               | 6                   | 34.3                 | <0.001                        | 14.1                  | >25                                            | 0  | 0   | 0   | 0  | 1  | 5                      | 0   | 0            | 8.0 | CR |
| ALL T-cell        | G5        | ALL-8            | A                    | 8               | 0               | 0               | 8               | 8                   | 10.8                 |                               |                       | >25                                            | 8  | 0   | 0   | 0  | 0  | 0                      | 0   | 0            | 0.0 | PD |
|                   |           |                  | B                    | 7               | 0               | 0               | 7               | 7                   | 32.8                 | <0.001                        | 3.0                   | >25                                            | 0  | 0   | 0   | 0  | 4  | 3                      | 0   | 0            | 6.0 | PR |
| ALL B-precursor   | G8        | ALL-19           | A                    | 8               | 0               | 0               | 8               | 8                   | 8.4                  |                               |                       | >25                                            | 8  | 0   | 0   | 0  | 0  | 0                      | 0   | 0            | 0.0 | PD |
|                   |           |                  | B                    | 8               | 0               | 1               | 7               | 7                   | 35.4                 | <0.001                        | 4.2                   | >25                                            | 0  | 0   | 0   | 0  | 1  | 6                      | 0   | 0            | 8.0 | CR |

<sup>1</sup> A: Control; <sup>2</sup> B: Treated; <sup>3</sup> N1 – number of mice in group; <sup>4</sup> Nd – number of mice that experienced toxic deaths; <sup>5</sup> No – number of additional mice excluded; <sup>6</sup> Na – number of mice analyzed; <sup>7</sup> Number of events. An event was defined as reaching  $\geq 25\%$  hCD45 cells in the peripheral blood; <sup>8</sup> Kaplan-Meier estimate of median days to event. Time to event was estimated using interpolation; <sup>9</sup> P-value comparing EFS of control and treated groups; <sup>10</sup> relative T/C at event; <sup>11</sup> median hCD45% in the peripheral blood at the end of the study.
